# Supplementary material for: Zinc Supplementation Stimulates Red Blood Cell Formation in Rats
Source: PubMed Central journal article supplement (PMC6165144; doi:10.3390/ijms19092824), 2018-09-18
Supplement: ijms-19-02824-s001.pdf [file ijms-19-02824-s001.pdf]

**Table S1.** Hematology of normal rats, PHZ-induced anemic rats, and saline- or ZnSO<sub>4</sub>-injected PHZ-induced anemic rats.

| Rat group                                                 | RBC<br>(10 <sup>6</sup> cells/m <sup>3</sup> ) | HCT<br>(%) | Hb<br>(g/dl) | MCV<br>(μm <sup>3</sup> ) | MCH<br>(pg/cell) | MCHC<br>(g/dl) |
|-----------------------------------------------------------|------------------------------------------------|------------|--------------|---------------------------|------------------|----------------|
| 1. Normal rats                                            | 6.91 ± 0.76                                    | 43.7 ± 5.7 | 15.6 ± 3.9   | 63 ± 7                    | 23 ± 7           | 36 ± 7         |
| 2. PHZ-induced anemic rats                                | 4.13 ± 0.49                                    | 23.6 ± 3.9 | 15.2 ± 0.9   | 71 ± 2                    | 37 ± 2           | 52 ± 4         |
| 3. Saline-injected<br>PHZ-induced anemic rats             | 3.58 ± 0.95                                    | 34.4 ± 3.9 | 14.7 ± 3.1   | 107 ± 37                  | 41 ± 5           | 42 ± 12        |
| 4. ZnSO <sub>4</sub> -injected<br>PHZ-induced anemic rats |                                                |            |              |                           |                  |                |
| 0.2 mg Zn/kg bw injected                                  | 3.89 ± 0.13                                    | 36.4 ± 2.0 | 15.7 ± 0.4   | 105 ± 4                   | 39 ± 2           | 42 ± 11        |
| 0.7 mg Zn/kg bw injected                                  | 3.91 ± 0.94                                    | 31.3 ± 4.7 | 15.3 ± 0.4   | 82 ± 10                   | 41 ± 9           | 50 ± 6         |
| 1.4 mg Zn/kg bw injected                                  | 4.66 ± 0.16*                                   | 34.1 ± 4.7 | 14.5 ± 0.5   | 77 ± 3                    | 31 ± 1*          | 40 ± 2         |
| 2.1 mg Zn/kg bw injected                                  | 4.64 ± 0.87*                                   | 36.7 ± 9.0 | 15.2 ± 2.9   | 80 ± 16                   | 34 ± 8           | 43 ± 9         |
| 2.8 mg Zn/kg bw injected                                  | 6.08 ± 0.69*                                   | 35.2 ± 0.6 | 14.1 ± 0.8   | 59 ± 6*                   | 23 ± 1*          | 40 ± 2         |
| 4.2 mg Zn/kg bw injected                                  | 5.72 ± 0.86*                                   | 36.5 ± 1.9 | 15.0 ± 0.2   | 65 ± 6*                   | 27 ± 4*          | 41 ± 3         |

1. *n* = 6.

2. Two days after the normal rats were injected with a single PHZ (60 mg/kg body weight) solution (*n* = 6).

3. Two days after the PHZ-induced anemic rats were injected with a saline solution (*n* = 6).

4. Two days after the PHZ-induced anemic rats were injected with different concentration of ZnSO<sub>4</sub> solution (*n* = 6 for each subgroup).

RBC: total red blood cell count, HCT: hematocrit, Hb: hemoglobin, MCV: mean corpuscular hemoglobin concentration (Hb/HCT×10), MCH: mean corpuscular hemoglobin (Hb/RBC×100), MCHC: mean corpuscular hemoglobin concentration (Hb/HCT×100).

The data are expressed as the mean ± SD.

This table is representative of three different experiments.

\*, significant difference between ZnSO<sub>4</sub>-injected and saline-injected anemic rats (*p* < 0.05, *n* = 6).

**Table S2.** Hematology of the normal rats and the saline- or ZnSO<sub>4</sub>-injected normal rats.

| Rat group                                                     | RBC<br>(10 <sup>6</sup> cells/m <sup>3</sup> ) | HCT<br>(%)     | Hb<br>(g/dl)   | MCV<br>( $\mu$ m <sup>3</sup> ) | MCH<br>(pg/cell) | MCHC<br>(g/dl) |
|---------------------------------------------------------------|------------------------------------------------|----------------|----------------|---------------------------------|------------------|----------------|
| 1. Normal rats                                                | 7.00 $\pm$ 0.63                                | 45.1 $\pm$ 2.4 | 16.8 $\pm$ 0.2 | 65 $\pm$ 2                      | 24 $\pm$ 2       | 37 $\pm$ 2     |
| 2. Saline-injected                                            | 6.67 $\pm$ 0.50                                | 40.2 $\pm$ 4.5 | 18.1 $\pm$ 1.0 | 61 $\pm$ 8                      | 27 $\pm$ 3       | 46 $\pm$ 8     |
| 3. 2.8 mg Zn/kg bw<br>ZnSO <sub>4</sub> -injected normal rats |                                                |                |                |                                 |                  |                |
| After 2 days                                                  | 7.19 $\pm$ 1.04                                | 45.4 $\pm$ 6.7 | 17.7 $\pm$ 1.1 | 63 $\pm$ 3                      | 25 $\pm$ 2       | 40 $\pm$ 5     |
| 4 days                                                        | 7.00 $\pm$ 0.53                                | 42.4 $\pm$ 4.9 | 17.0 $\pm$ 1.0 | 60 $\pm$ 4                      | 24 $\pm$ 2       | 41 $\pm$ 6     |
| 8 days                                                        | 6.67 $\pm$ 0.51                                | 41.4 $\pm$ 2.2 | 17.1 $\pm$ 0.4 | 62 $\pm$ 3                      | 26 $\pm$ 2       | 41 $\pm$ 2     |

1.  $n = 6$ .

2. Two days after the normal rats were injected with a saline solution ( $n = 6$ )

3. Two, 4, and 8 d after the normal rats were injected with 2.8 mg Zn/kg body weight of ZnSO<sub>4</sub> solution ( $n = 6$  for each subgroup).

RBC: total red blood cell count, HCT: hematocrit, Hb: hemoglobin, MCV: mean corpuscular hemoglobin concentration (HCT/HCT $\times$ 10), MCH: mean corpuscular hemoglobin (Hb/RBC $\times$ 100), MCHC: mean corpuscular hemoglobin concentration (Hb/HCT $\times$ 100).

The data are expressed as the mean  $\pm$  SD.

**Table S3.** Suspension cultures of rat bone marrow cells with different supplementation. Cultured cells were harvested after 24 h and measured with a cell counter. Cell growth is expressed as the ratio of the number of 5.1- $\mu$ g cells at the start of the culture compared with that of the control.

| Supplementation                                                       | Cell growth |                                |
|-----------------------------------------------------------------------|-------------|--------------------------------|
|                                                                       | 0 d         | 1 d                            |
| 1. Medium only                                                        | 1.00        | 1.22 $\pm$ 0.10                |
| 2. a. medium+0.3 mM ZnCl <sub>2</sub>                                 | 1.00        | 1.15 $\pm$ 0.04                |
| b. medium+10% rat serum                                               | 1.00        | 1.13 $\pm$ 0.19                |
| c. medium+0.1 $\mu$ g/mL rat transferrin                              | 1.00        | 1.16 $\pm$ 0.05                |
| 3. a. medium+0.3 mM ZnCl <sub>2</sub><br>+10% rat serum               | 1.00        | 1.56 $\pm$ 0.26 <sup>***</sup> |
| b. medium+0.3 mM ZnCl <sub>2</sub><br>+0.1 $\mu$ g/mL rat transferrin | 1.00        | 1.46 $\pm$ 0.06 <sup>***</sup> |
| 4. a. medium+0.1 mM FeCl <sub>3</sub>                                 | 1.00        | 0.99 $\pm$ 0.31                |
| b. medium+0.3 mM FeCl <sub>3</sub>                                    | 1.00        | 0.98 $\pm$ 0.21                |
| c. medium+0.3 mM FeCl <sub>3</sub><br>+10% rat serum                  | 1.00        | 1.00 $\pm$ 0.18                |
| d. medium+0.3 mM FeCl <sub>3</sub><br>+0.1 $\mu$ g/mL rat transferrin | 1.00        | 0.96 $\pm$ 0.17                |

Results are the mean  $\pm$  SD from six independent experiments.

<sup>\*\*\*</sup>; Significant difference ( $P < 0.001$ ) between cell growth at 0 and 1 day.
